# Supplementary material
Source: Springer Nature journal article supplement (https://www.springermedizin.de/resource/supplementary/12884_2011_483_MOESM4_ESM.pdf/9457918)

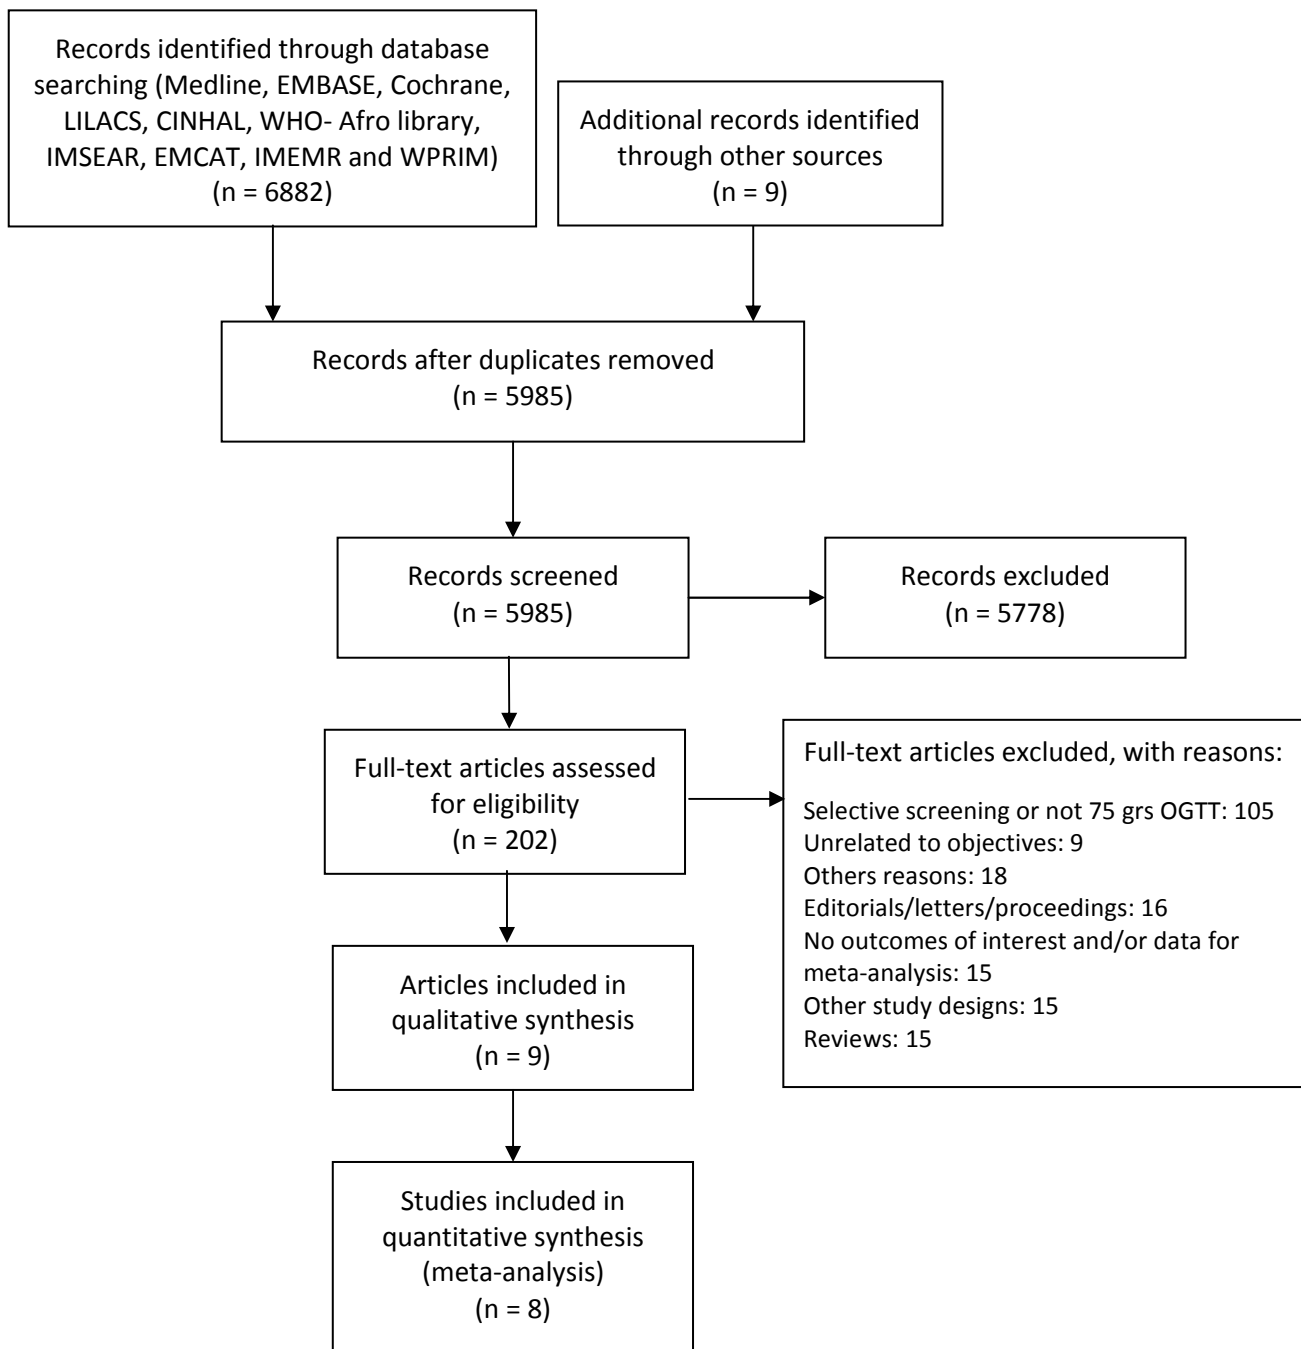

Supplement: MOESM4 [file 9457918]
